# Supplementary material for: A Comparison of a Traditional Clinical Experience to a Precepted Clinical Experience for Baccalaureate-Seeking Nursing Students in Their Second Semester
Source: Hindawi journal article supplement (doi:10.1155/2012/276506), 2012-01-01
Supplement: f1 [file 276506.f1.pdf]

Table 1

### Preceptor Evaluation of Student

Student Name: \_\_\_\_\_  
 Date \_\_\_\_\_ Number of Hours: \_\_\_\_\_  
 Preceptor: \_\_\_\_\_ Hospital: \_\_\_\_\_

**Please complete this form after each clinical session with the student. If you answer no to questions 1-4 or rate 1-2 on questions 5-26, please notify the instructor.**

|                                         | No | Yes |                           |
|-----------------------------------------|----|-----|---------------------------|
| 1. Was on time                          | 1  | 2   | If no, Arrival Time _____ |
| 2. Was dressed in UT student uniform    | 1  | 2   |                           |
| 3. Maintains confidentiality of patient | 1  | 2   |                           |
| 4. Safely administers medications       | 1  | 2   |                           |

**1-Unsatisfactory**      **2-Needs Improvement**      **3-Average**      **4-Good**      **5**  
**Excellent**

Member of a Profession:

|                                                   |   |   |   |   |   |   |   |   |
|---------------------------------------------------|---|---|---|---|---|---|---|---|
| 5. Communicates in a goal-directed manner         |   |   |   | 1 | 2 | 3 | 4 | 5 |
| 6. Demonstrates ability to think critically       | 1 | 2 | 3 | 4 | 5 |   |   |   |
| 7. Seeks constructive feedback regarding practice |   |   |   | 1 | 2 | 3 | 4 | 5 |
| 8. Seeks knowledge/skill appropriate to course    |   |   |   | 1 | 2 | 3 | 4 | 5 |

Provider of Care

*Assessment:*

|                                                              |  |  |  |   |   |   |   |   |
|--------------------------------------------------------------|--|--|--|---|---|---|---|---|
| 9. Accurately interprets the meaning of lab values           |  |  |  | 1 | 2 | 3 | 4 | 5 |
| 10. Obtains significant data from patient/family/records     |  |  |  | 1 | 2 | 3 | 4 | 5 |
| 11. Is sensitive to socio-cultural aspects of patient/family |  |  |  | 1 | 2 | 3 | 4 | 5 |

*Diagnoses:*

|                                                              |  |  |  |   |   |   |   |   |
|--------------------------------------------------------------|--|--|--|---|---|---|---|---|
| 12. Determines nursing diagnoses appropriate to patient data |  |  |  | 1 | 2 | 3 | 4 | 5 |
| 13. Recognizes priority care problems                        |  |  |  | 1 | 2 | 3 | 4 | 5 |
| 14. Discusses pathology related to problem statement         |  |  |  | 1 | 2 | 3 | 4 | 5 |

*Plan:*

|                                 |  |  |  |   |   |   |   |   |
|---------------------------------|--|--|--|---|---|---|---|---|
| 15. Goal criteria are realistic |  |  |  | 1 | 2 | 3 | 4 | 5 |
|---------------------------------|--|--|--|---|---|---|---|---|

*Implementation:*

|                                                        |  |  |  |   |   |   |   |   |
|--------------------------------------------------------|--|--|--|---|---|---|---|---|
| 16. Nursing interventions are safely completed         |  |  |  | 1 | 2 | 3 | 4 | 5 |
| 17. Interventions are individualized to patient/family |  |  |  | 1 | 2 | 3 | 4 | 5 |
| 18. Supports interventions with scientific principles  |  |  |  | 1 | 2 | 3 | 4 | 5 |
| 19. Demonstrates initiative in performing patient care |  |  |  | 1 | 2 | 3 | 4 | 5 |
| 20. Demonstrates basic knowledge of medications        |  |  |  | 1 | 2 | 3 | 4 | 5 |

*Evaluation:*

|                                                             |  |  |  |   |   |   |   |   |
|-------------------------------------------------------------|--|--|--|---|---|---|---|---|
| 21. Determines if goal achieved                             |  |  |  | 1 | 2 | 3 | 4 | 5 |
| 22. Modifies nursing interventions appropriately, if needed |  |  |  | 1 | 2 | 3 | 4 | 5 |

Coordinator of Care

|                                                              |  |  |  |   |   |   |   |   |
|--------------------------------------------------------------|--|--|--|---|---|---|---|---|
| 23. Safely performs patient care                             |  |  |  | 1 | 2 | 3 | 4 | 5 |
| 24. Reports changes in patient conditions to preceptor/staff |  |  |  | 1 | 2 | 3 | 4 | 5 |
| 25. Establishes a collaborative relationship with others     |  |  |  | 1 | 2 | 3 | 4 | 5 |
| 26. Charting meets the guidelines of the institution         |  |  |  | 1 | 2 | 3 | 4 | 5 |

Comments \_\_\_\_\_  
 \_\_\_\_\_

**Preceptor's signature** \_\_\_\_\_
